# Supplementary material
Source: PubMed Central journal article supplement (PMC3117921)
Supplement: NIHMS282526-supplement-01.pdf [file NIHMS282526-supplement-01.pdf]

**Supplementary Table 1. Comparison of Gastric Contractile Parameters for Distal Propagating Contractions in Healthy Subjects and Dyspepsia**

|                                                | Controls    | Patients with Normal GE | Patients with Rapid GE | Odds Ratios (95% CI) by Multiple Variable Analysis |                                 |
|------------------------------------------------|-------------|-------------------------|------------------------|----------------------------------------------------|---------------------------------|
|                                                |             |                         |                        | Controls vs Normal GE                              | Controls vs Rapid GE            |
| N of subjects with distal contractions         | 13          | 7                       | 8                      |                                                    |                                 |
| Number of propagating distal contractions*     | 1.4 ± 0.1   | 1.0 ± 0                 | 1.2 ± 0.1              | NA                                                 | NA                              |
| <b>Summary parameters for contraction</b>      |             |                         |                        |                                                    |                                 |
| Period (seconds)                               | 19.6 ± 0.5  | 24.4 ± 2.6              | 22.1 ± 1.3             | 1.70(1.03, 2.80)                                   | 1.57 (0.95, 2.60)               |
| Proximal limit (mm)                            | 43.3 ± 8.5  | 44.9 ± 10.0             | 48.1 ± 6.6             | NA                                                 | NA                              |
| Distal limit (mm)                              | 7.8 ± 2.0   | 8.7 ± 2.8               | 4.6 ± 1.5              | NA                                                 | NA                              |
| Length of contraction (mm)                     | 35.1 ± 7.5  | 36.1 ± 10.2             | 43.5 ± 6.3             | NA                                                 | NA                              |
| Velocity of propagation (mm/s) <sup>‡</sup>    | 4.1 ± 0.6   | 2.7 ± 0.8               | 2.6 ± 0.3              | 0.39 (0.13, 1.24)                                  | 0.29 (0.08, 1.04)               |
| Average relative amplitude change <sup>†</sup> | 0.38 ± 0.04 | 0.36 ± 0.06             | 0.60 ± 0.06            | 1.63 (0.34, 7.72) <sup>§</sup>                     | 9.33 (1.43, 60.85) <sup>§</sup> |
| Mean duration (s)                              | 7.2 ± 0.2   | 7.9 ± 0.5               | 8.2 ± 0.5              | NA                                                 | NA                              |
| Duration of contraction – CV (%) <sup>†</sup>  | 11 ± 2      | 13 ± 3                  | 19 ± 2                 | NA                                                 | NA                              |

Values are Mean + SEM

\* This is the number of all propagating contractions. The summary parameters are for the longest propagating contraction in each subject.

<sup>†</sup> p = 0.01 <sup>‡</sup> p = 0.08 by Kruskal-Wallis test

<sup>§</sup> per 0.1 unit change in relative amplitude

NA – not applicable (not included in multiple variable model)

**Supplementary Table 2. Comparison of gastric volumes measured by different MR pulse sequences in healthy subjects and patients**

| Measurement*                 | HASTE   | LAVA    | CCC (95% CI)      | p value for Bland Altman Assessment # |
|------------------------------|---------|---------|-------------------|---------------------------------------|
| Fasting volume               | 175 ± 9 | 166 ± 8 | 0.90 (0.85, 0.95) | 0.06                                  |
| Postprandial change (5 min)  | 355 ± 8 | 399 ± 9 | 0.54 (0.37, 0.71) | 0.19                                  |
| Postprandial change (10 min) | 340 ± 8 | 383 ± 8 | 0.58 (0.43, 0.73) | 0.05                                  |
| Postprandial change (20 min) | 327 ± 9 | 359 ± 8 | 0.60 (0.42, 0.78) | 0.03                                  |
| Postprandial change (30 min) | 312 ± 9 | 339 ± 9 | 0.60 (0.42, 0.79) | 0.23                                  |

Numbers reflect imaging time, in minutes, relative to meal ingestion. Postprandial change is the difference between postprandial and fasting volume.

# Test for (Pearson) correlation of differences versus overall mean
